# Supplementary material
Source: PubMed Central journal article supplement (PMC9202392)
Supplement: iai.00016-22-s0001.pdf [file iai.00016-22-s0001.pdf]

Fig S1

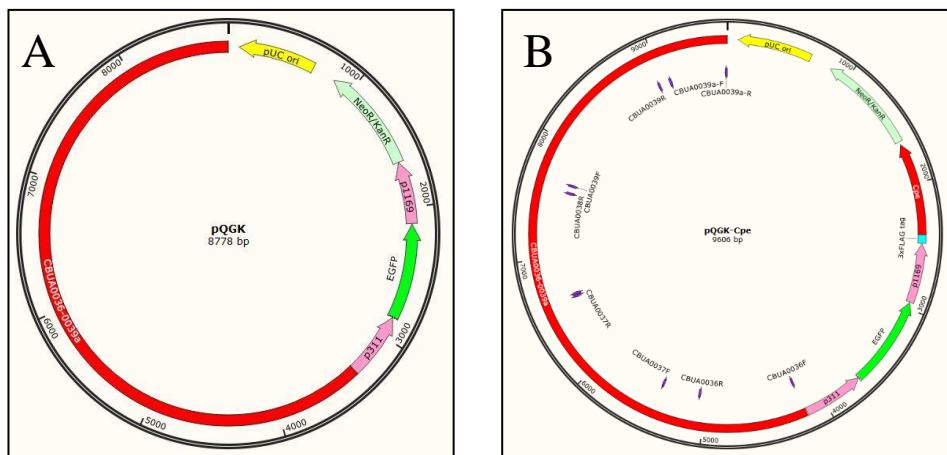

Supplementary Fig 1. Patterns of QpH1-based shuttle plasmids used in the construction of *C. burnetii* mutants. (A) pQGK plasmid. (B) pQGK-cpe plasmid.

Fig S2

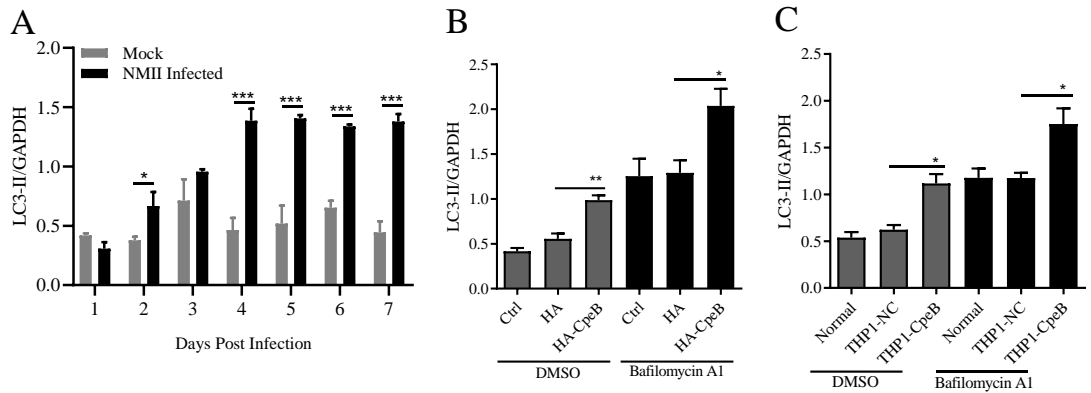

**Supplementary Fig 2. The band density of LC3-II in Fig 1 was quantitated by densitometry.** A, B and C showed the quantification analysis of Fig 1A, F and G, respectively. GAPDH expression was used as an internal control. The relative level of LC3-II was calculated as follows: the band density of LC3-II in each sample/ that of GAPDH in the same sample. Bars represent the mean  $\pm$  SD of three independent experiments. \*\*\*,  $p < 0.001$ , \*\*,  $p < 0.01$  and \*,  $p < 0.05$ .

Fig S3

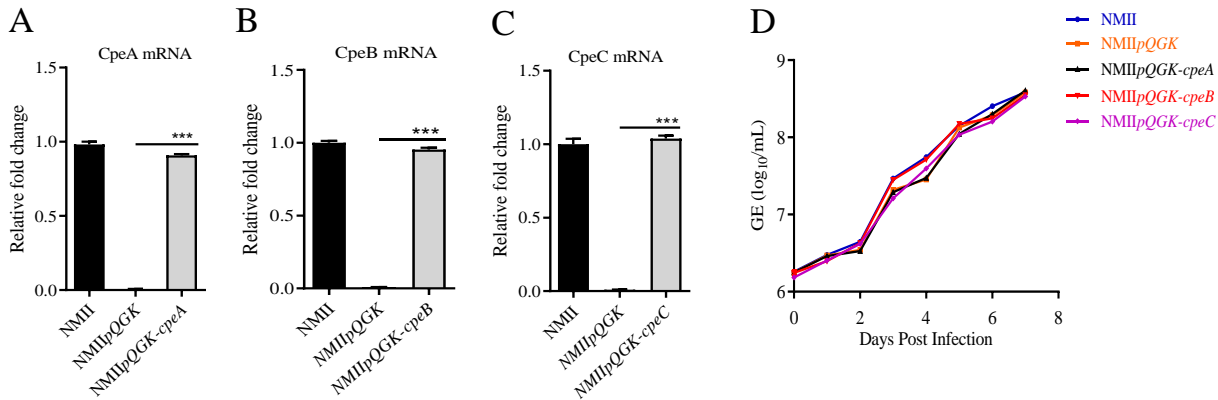

**Supplementary Fig 3.** (A-C) Detection of the efficiency of gene knockout and complementation. mRNA of THP1 cells infected with different *C. burnetii* strains was extracted after 5 days of infection and was quantitated by qRT-PCR. The relative levels of CpeA (A), CpeB (B), CpeC (C) were calculated as follows: the copy number of gene in *C. burnetii* mutants/that in WT *C. burnetii*. (D) There was no difference in growth characteristics between WT *C. burnetii* and *C. burnetii* mutants in vitro. WT *C. burnetii* or *C. burnetii* mutants were collected at different time points (1, 2, 3, 4, 5, 6 and 7 d) after culture in ACCM-2. Genomic DNA was extracted and quantitated by qPCR. Experiments were repeated three times independently and the trend was consistent. Data are representative of three independent experiments. Bars represent the mean  $\pm$  SD of three independent experiments. \*\*\*,  $p < 0.001$ .

Fig S4

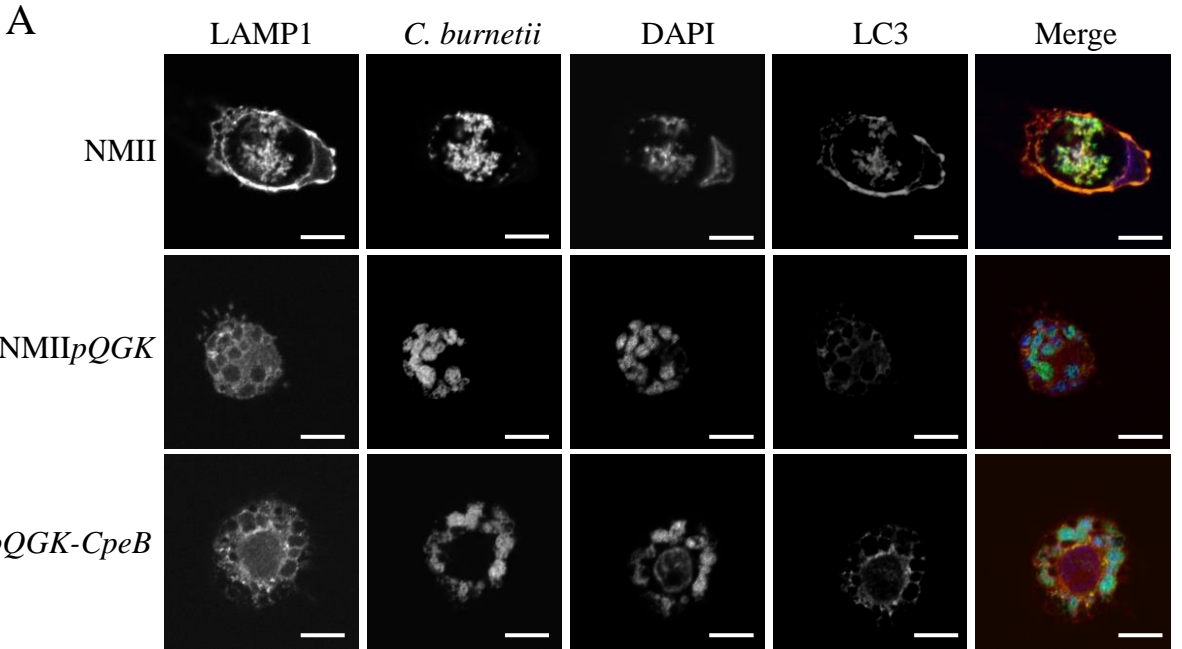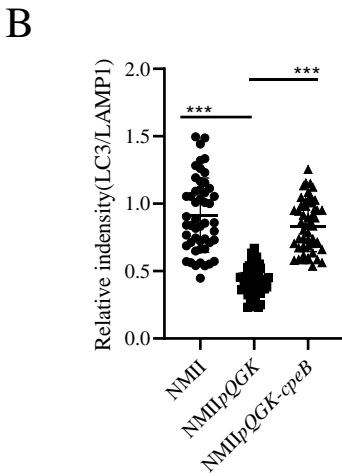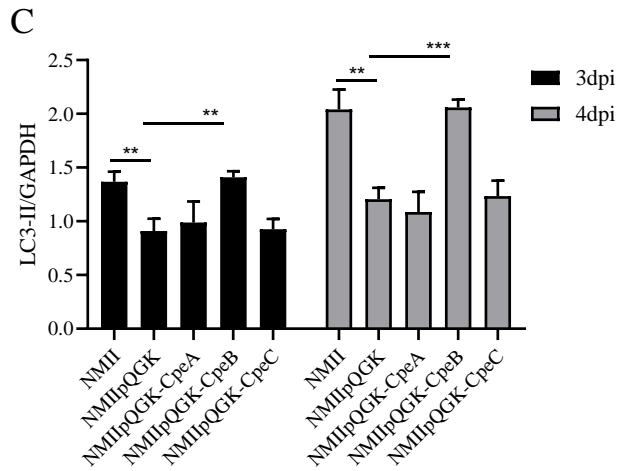

**Supplementary Fig 4.** (A) Differentiated THP-1 cells were infected with NMII, NMIIpQGK or NMIIpQGK-CpeB strains at an MOI of 100 respectively. Three days post infection, cells were fixed and subjected to confocal scanning. LC3 was labeled with anti-LC3 antibody followed by goat anti-rabbit Cy5 antibody. LAMP1 was probed with anti-LAMP1 antibody, followed by goat anti-rabbit Alexa Fluor 594 antibody (red) and NMII was marked by anti-*C. burnetii* serum followed by goat anti-mouse Alexa Fluor 488 antibody (green). Nucleic acid was stained with DAPI (blue). N=7. The samples were observed with a laser confocal scanning microscope (magnification,  $\times 600$ , bar = 10  $\mu\text{m}$ ). (B) The intensity of LC3 presented on vacuole membranes was measured for at least 50 cells using Imaris 9.0.1 software. The relative intensity was calculated as follows: intensity of LC3 in infected cells/intensity of LAMP1 in infected cells. The intensity of LAMP1 was used as a control for the amount of CCVs and autolysosomes generated by *C. burnetii* infection. Bars represent the mean  $\pm$  SD. \*\*\*,  $p < 0.001$ . (C) The quantification analysis of Fig 2E. The relative level of LC3-II was calculated as follows: the band density of LC3-II in each sample/ that of GAPDH in the same sample. Bars represent the mean  $\pm$  SD of four independent experiments. \*\*\*,  $p < 0.001$ , \*\*,  $p < 0.01$ .

Fig S5

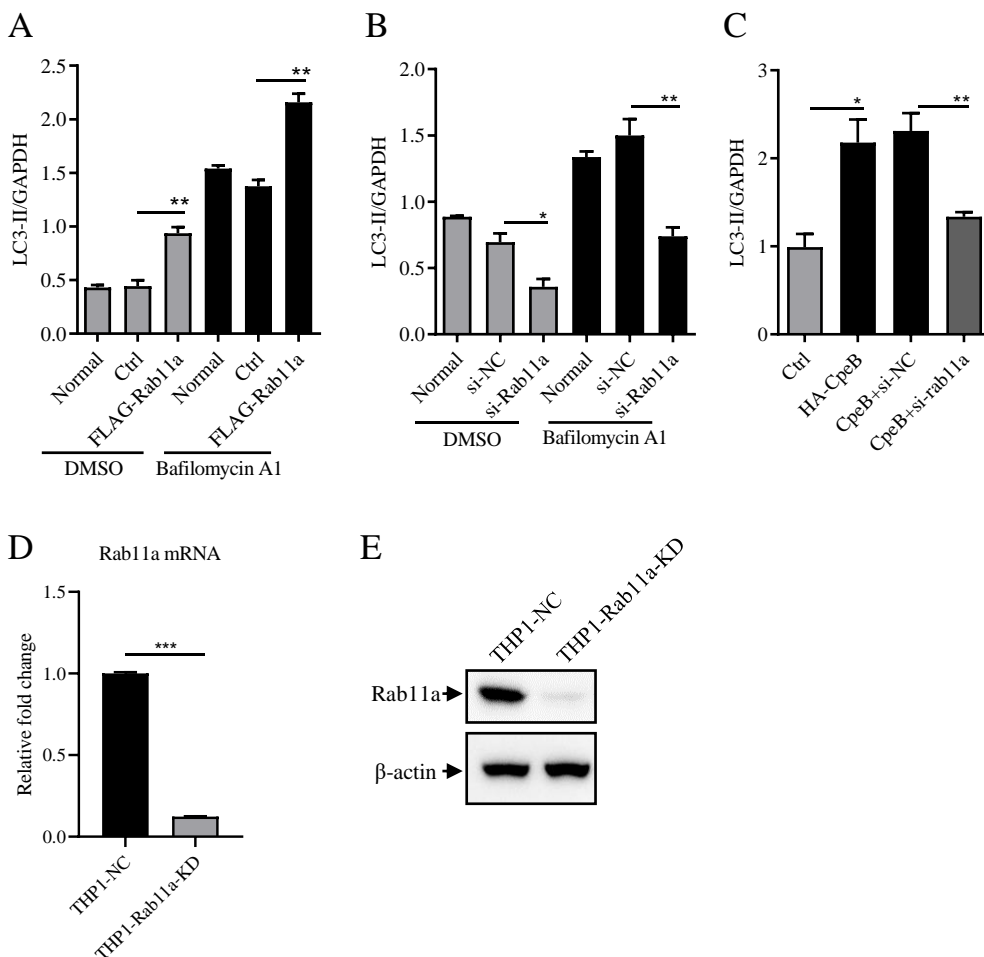

**Supplementary Fig 5.** (A-C) The band density of LC3-II in and Fig 6 was quantitated by densitometry. A, B and C were the quantification analysis of Fig 6B, C and G respectively. GAPDH expression was used as an internal control. The relative level of LC3-II was calculated as follows: the band density of LC3-II in each sample/ that of GAPDH in the same sample. (D) Total mRNA of THP1-NC or THP1-Rab11a-KD cells was extracted and the relative expression of Rab11a mRNA was quantitated by qRT-PCR. GAPDH was used as an internal control. The relative levels of gene expression were calculated as follows: mRNA expression of rab11a gene in THP1-Rab11a-KD cells/ that in THP1-NC cells. (E) THP1-NC or THP1-Rab11a-KD cells were lysed and the samples were examined with Western blotting using an anti-Rab11a antibody. Endogenous  $\beta$ -actin expression was used as an internal control. Bars represent the mean  $\pm$  SD of three independent experiments. \*\*,  $p < 0.01$  and \*,  $p < 0.05$ .

# Fig S6

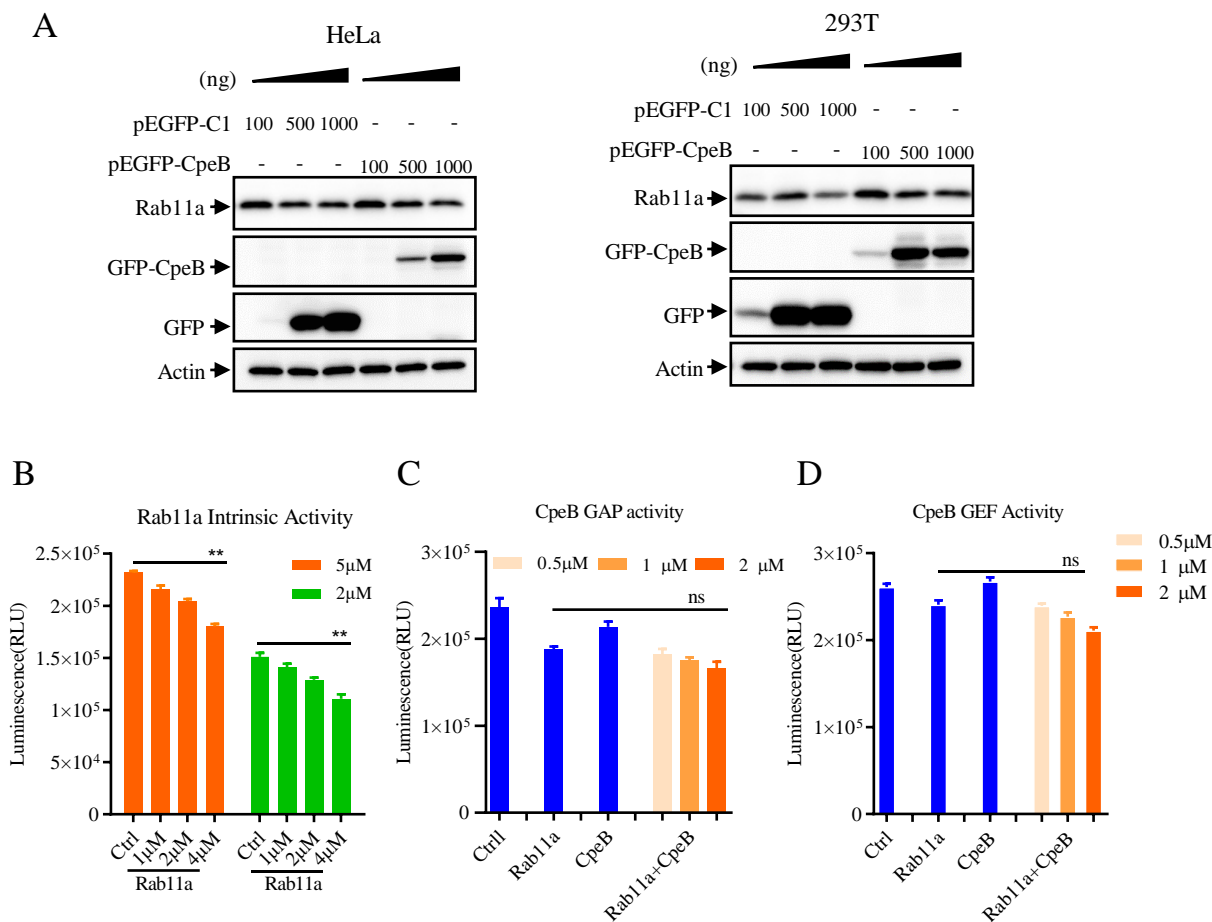

**Supplementary Fig 6. CpeB had no effect on the expression or the activation of Rab11a.** (A) CpeB had no effect on the expression of Rab11a. HeLa (left) or 293T (right) cells were transfected with pEGFP-CpeB or pEGFP-C1 control plasmid at the indicated concentration. Twenty-four hours later, cell lysates were subjected to Western blotting, and the expression of endogenous Rab11a was detected. (B) The GTPase activity of Rab11a at different concentrations was detected in the presence of 5  $\mu$ M or 2  $\mu$ M GTP. The GTPase/GAP buffer without Rab11a was used as a control. (C-D) CpeB at different concentrations was added to GTPase/GAP buffer (C) or GEF buffer (D) containing 4  $\mu$ M Rab11a, 1 mM DTT and 5  $\mu$ M GTP. The corresponding control group was set up at the same time. After incubation and the addition of reaction solution, the full-wavelength luminescence was measured. Each experiment was performed in triplicate and data are representative of three independent experiments. Bars represent the mean  $\pm$  SD. \*\*,  $p < 0.01$ , ns for no significance.
